# Supplementary material
Source: publisher figshare collection journal article supplement (https://gsajournals.figshare.com/ndownloader/files/17651096)
Supplement: Supplementary file 1 [file 17651096]

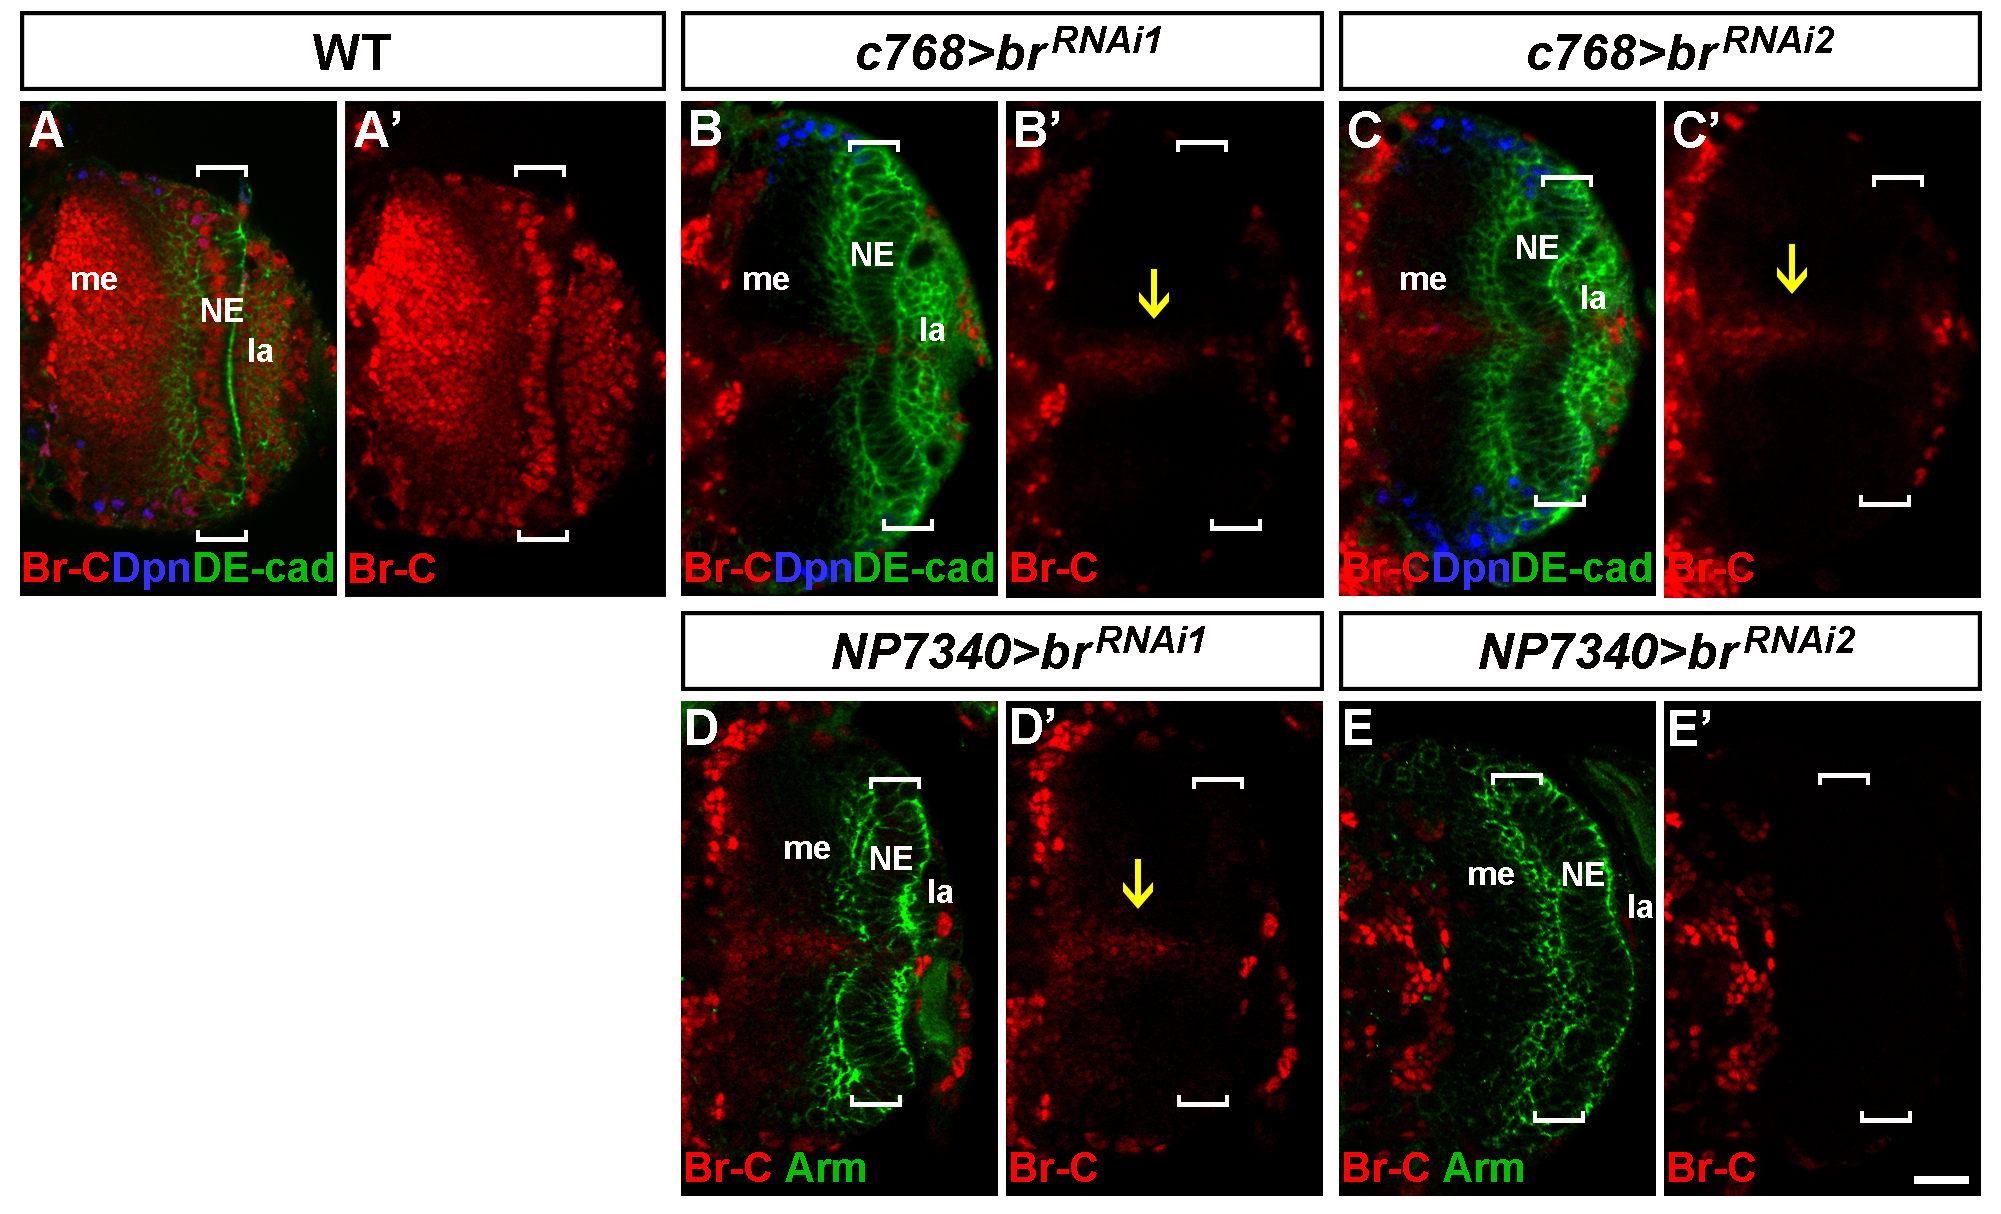


**Figure S2** *broad* RNAi knockdown in the optic lobe.Late-third instar larval brains stained for Broad-core (Br-C, red), DE-Cad (green) and Dpn (blue). (A, A’) A wild-type brain. Broad is expressed in the NEs, lamina and medulla. (B, B’) A *c768-Gal4/UAS-brRNAi1*brain. Broad is eliminated from the NEs and is also largely eliminated from the medulla cortex except for a strip of cells (arrow). (C, C’) A *c768-Gal4/UAS-brRNAi2* brain. Broad is eliminated from the NEs and is also largely eliminated from the medulla cortex except for a strip of cells (arrow). (D, D’) An *NP7340-Gal4/UAS-brRNAi1*brain. Broad is eliminated from the NEs and is also largely eliminated from the medulla cortex except for a strip of cells (arrow). (E, E’) an *NP7340-Gal4/UAS-brRNAi2* brain. Broad expression is eliminated from the NEs and the medulla cortex. Brackets indicate the OPC NEs. me: medulla, la: lamina. Lateral is to the right. Scale bar: 20 m.
